# Supplementary material for: Exposure to Potentially Dangerous Drug-Drug Interactions Involving Antipsychotics
Source: Atypon-hosted journal article supplement (doi:10.1176/appi.ps.201100443), 2012-11-01
Supplement: 1080_ds001.pdf [file 1080_ds001.pdf]

**Figure 1. Selection of study patients with schizophrenia in a large state's Medicaid population**

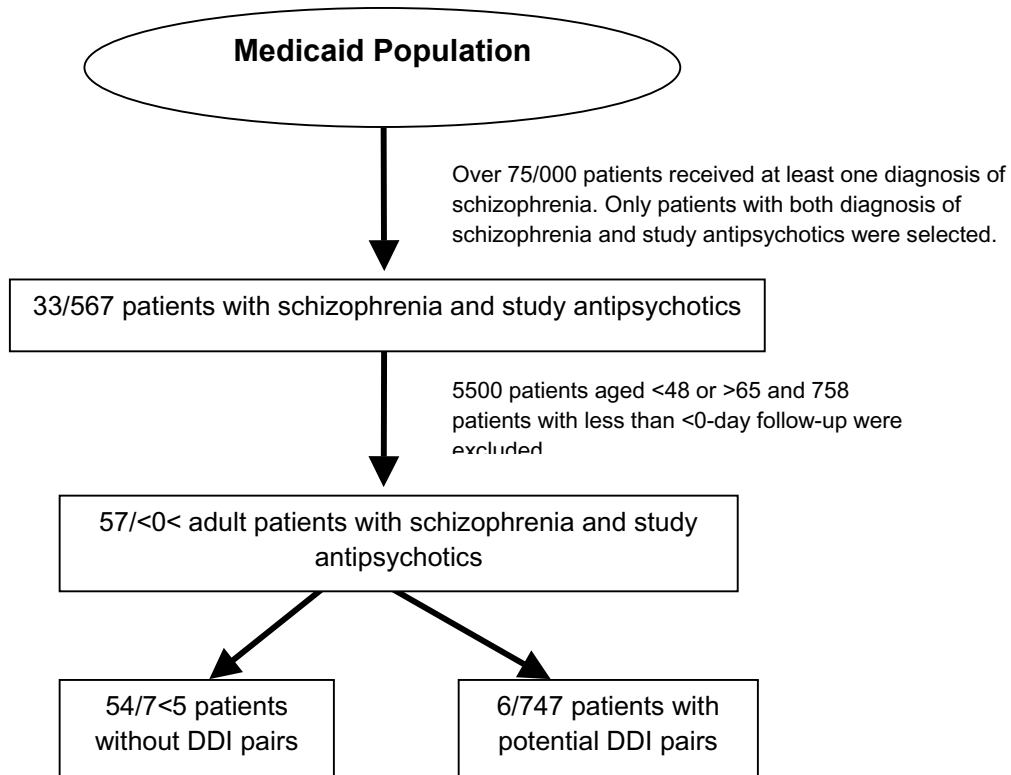

**Appendix 1. Potentially harmful drug-drug-interaction pairs Involving six atypical antipsychotics (risperidone, olanzapine, quetiapine, ziprasidone, aripiprazole, clozapine) and three typical antipsychotics (haloperidol, perphenazine, chlorpromazine)**

| <b>Antipsychotic and Interacting Drug</b> | <b>Significance *</b> | <b>Interaction Type</b> | <b>Enzyme Type</b> |
|-------------------------------------------|-----------------------|-------------------------|--------------------|
| <b>Aripiprazole</b>                       |                       |                         |                    |
| Aripiprazole with Itraconazole            | 5                     | Inhibitor               | 3A7                |
| Aripiprazole with Ketoconazole            | 5                     | Inhibitor               | 3A7                |
| Aripiprazole with Carbamazepine           | 5                     | Inducer                 | 3A7                |
| Aripiprazole with Quinidine               | 5                     | Inhibitor               | 5D6                |
| Aripiprazole with Fluoxetine              | 7                     | Inhibitor               | 5D6                |
| Aripiprazole with Paroxetine              | 7                     | Inhibitor               | 5D6                |
| <b>Clozapine</b>                          |                       |                         |                    |
| Clozapine with Ritonavir                  | 4                     | Inhibitor               | 3A7                |
| Clozapine with Citalopram                 | 4                     | Inhibitor               | 5D6                |
| Clozapine with Fluoxetine                 | 4                     | Inhibitor               | 5D6                |
| Clozapine with Sertraline                 | 4                     | Inhibitor               | 5D6                |
| Clozapine with Fluvoxamine                | 4                     | Inhibitor               | 3A7                |
| Clozapine with Phenobarbital              | 5                     | Inducer                 | 3A7                |
| Clozapine with Carbamazepine              | 7                     | Inducer                 | 3A7                |
| Clozapine with Cimetidine                 | 7                     | Inhibitor               | 4A5                |
| Clozapine with Phenytoin                  | 7                     | Inhibitor               | 3A7                |
| Clozapine with Ciprofloxacin              | 7                     | Inhibitor               | 4A5                |
| Clozapine with Norfloxacin                | 7                     | Inhibitor               | 3A7                |
| Clozapine with Rifabutin                  | 7                     | Inducer                 | 3A7                |
| Clozapine with Rifampin                   | 7                     | Inducer                 | 3A7                |
| Clozapine with Rifapentine                | 7                     | Inducer                 | 3A7                |
| <b>Olanzapine</b>                         |                       |                         |                    |
| Olanzapine with Ritonavir                 | 5                     | Inhibitor               | 4A5                |
| Olanzapine with Haloperidol               | 7                     | Inhibitor               | 5D6                |
| Olanzapine with Clomipramine              | 7                     | Inhibitor               | 5D6                |
| Olanzapine with Fluvoxamine               | 7                     | Inhibitor               | 4A5                |
| Olanzapine with Ciprofloxacin             | 7                     | Inhibitor               | 4A5                |
| Olanzapine with Norfloxacin               | 7                     | Inhibitor               | 4A5                |
| Olanzapine with Carbamazepine             | 7                     | Inducer                 | 4A5                |
| Olanzapine with Fluoxetine                | 7                     | inhibitor               | 4A5                |
| <b>Quetiapine</b>                         |                       |                         |                    |
| Quetiapine with Fluconazole               | 5                     | Inhibitor               | 3A7                |
| Quetiapine with Itraconazole              | 5                     | Inhibitor               | 3A7                |
| Quetiapine with Ketoconazole              | 5                     | Inhibitor               | 3A7                |
| Quetiapine with Voriconazole              | 5                     | Inhibitor               | 3A7                |
| Quetiapine with Phenytoin                 | 5                     | Inducer                 | 3A7                |
| Quetiapine with Carbamazepine             | 7                     | Inducer                 | 3A7                |
| Quetiapine with Clarithromycin            | 7                     | Inhibitor               | 3A7                |
| Quetiapine with Erythromycin              | 7                     | Inhibitor               | 3A7                |
| Quetiapine with Fluvoxamine               | 7                     | Inhibitor               | 3A7                |
| <b>Risperidone</b>                        |                       |                         |                    |
| Risperidone with Fluoxetine               | 4                     | Inhibitor               | 5D6                |
| Risperidone with Paroxetine               | 4                     | Inhibitor               | 5D6                |
| Risperidone with Sertraline               | 4                     | Inhibitor               | 5D6                |
| Risperidone with Fluconazole              | 5                     | Inhibitor               | 3A7                |
| Risperidone with Itraconazole             | 5                     | Inhibitor               | 3A7                |
| Risperidone with Ketoconazole             | 5                     | Inhibitor               | 3A7                |
| Risperidone with Carbamazepine            | 7                     | Inducer                 | 5D6                |
| Risperidone with Thioridazine             | 7                     | Inhibitor               | 5D6                |
| Risperidone with Amprenavir               | 7                     | Inhibitor               | 3A7                |
| Risperidone with Atazanavir               | 7                     | Inhibitor               | 3A7                |
| Risperidone with Indinavir                | 7                     | Inhibitor               | 3A7                |

|                                      |   |           |     |
|--------------------------------------|---|-----------|-----|
| Risperidone with Lopinavir/Ritonavir | 7 | Inhibitor | 3A7 |
| Risperidone with Nelfinavir          | 7 | Inhibitor | 3A7 |
| Risperidone with Ritonavir           | 7 | Inhibitor | 3A7 |
| Risperidone with Saquinavir          | 7 | Inhibitor | 3A7 |
| <b>Ziprasidone</b>                   |   |           |     |
| Ziprasidone with Thioridazine        | 4 | Inhibitor | 3A7 |
| Ziprasidone with Chlorpromazine      | 4 | Inducer   | 3A7 |
| Ziprasidone with Quinidine           | 4 | Inhibitor | 5D6 |
| Ziprasidone with Amiodarone          | 4 | Inhibitor | 3A7 |
| Ziprasidone with Pimozide            | 4 | Inducer   | 3A7 |
| Ziprasidone with Carbamazepine       | 5 | Inducer   | 3A7 |
| Ziprasidone with Ketoconazole        | 7 | Inhibitor | 3A7 |
| <b>Haloperidol</b>                   |   |           |     |
| Haloperidol with Fluconazole         | 5 | Inhibitor | 3A7 |
| Haloperidol with Itraconazole        | 5 | Inhibitor | 3A7 |
| Haloperidol with Ketoconazole        | 5 | Inhibitor | 3A7 |
| Haloperidol with Carbamazepine       | 5 | Inducer   | 3A7 |
| Haloperidol with Rifabutin           | 5 | Inducer   | 3A7 |
| Haloperidol with Rifampin            | 5 | Inducer   | 3A7 |
| Haloperidol with Primidone           | 7 | Inducer   | 4A5 |
| Haloperidol with Fluvoxamine         | 7 | Inhibitor | 4A5 |
| Haloperidol with Fluphenazine        | 7 | Inhibitor | 5D6 |
| Haloperidol with Perphenazine        | 7 | Inhibitor | 5D6 |
| Haloperidol with Thioridazine        | 7 | Inhibitor | 5D6 |
| Haloperidol with Quinidine           | 7 | Inhibitor | 5D6 |
| <b>Perphenazine</b>                  |   |           |     |
| Perphenazine with Paroxetine         | 5 | Inhibitor | 5D6 |
| Perphenazine with Haloperidol        | 7 | Inhibitor | 5D6 |
| Perphenazine with Phenytoin          | 7 | Inducer   | 3A7 |
| <b>Chlorpromazine</b>                |   |           |     |
| Chlorpromazine with Propranolol      | 4 | Inhibitor | 4A5 |
| Chlorpromazine with Fluoxetine       | 4 | Inhibitor | 5D6 |
| Chlorpromazine with Ziprasidone      | 4 | Inhibitor | 3A7 |
| Chlorpromazine with Paroxetine       | 5 | Inhibitor | 5D6 |
| Chlorpromazine with Amphetamine      | 7 | Inhibitor | 5D6 |
| Chlorpromazine with Haloperidol      | 7 | Inhibitor | 5D6 |
| Chlorpromazine with Phenytoin        | 7 | Inhibitor | 3A7 |
| Chlorpromazine with Trazodone        | 7 | Inhibitor | 5D6 |

\* 4 (major) refers to a potentially severe or life-threatening interaction/ capable of causing permanent damage.

\* 5 (moderate) refers to an interaction that may cause deterioration in a patient's clinical status/ possibly requiring additional treatment/ hospitalization/ or an extended hospital stay.

\* 7 (major/moderate) refers to a potentially severe or life threatening interaction/ capable of causing permanent damage/ or an interaction that may cause deterioration in a patient's clinical status/ possibly requiring additional treatment/ hospitalization/ or an extended hospital stay.

**Sources:** Facts & Comparisons 7.0/ 5006/ Facts and Comparisons. Drug interaction facts. Wolters Kluwer Co. 444 West Port Plaza/ Suite 700. St. Louis/ Missouri/ USA; FDA approved labeling or product package inserts; and published drug interaction references.
